# Supplementary material
Source: publisher figshare collection journal article supplement (https://acs.figshare.com/ndownloader/files/3762826)
Supplement: Supplementary file 1 [file 3762826]

## Sheet: P1 Deformations
Out-of-plane deformations of geometry optimized structures
Φ (Gly76)	ψ (Gly76)	Cα-C=O (°) CAO	N-C=O (°) NAO	Cα-C'-N (°) CAN	Deviation from sp2 (°)	dC–N	ω1 Cα'-N-C'=O (°)	ω2 H-N-C'-Cα (°)	ω3 Cα-C'-N-Cα' (°)	ω4 H-N-C'=O (°)	ω1 - ω3	ω1 - ω3 + 180	MOD(Pn,360)	χC	χC - χC (mean)	ω2 - ω3	ω2 - ω3 + 180	MOD(Pn,360)	χN	χN - χN (mean)	τ
-180	-180	121.005	124.026	114.969	0.003	1.343	1.388	-2.403	-179.151	178.137	180.539	360.539	0.539	0.539	0.014	176.748	356.748	356.748	-3.252	0.176878	-0.5075
-180	-170	120.885	124.025	115.09	0	1.343	3.537	-1.682	-176.659	178.514	180.196	360.196	0.196	0.196	-0.329	174.977	354.977	354.977	-5.023	-1.59412	0.9275
-180	-160	120.71	124.025	115.265	0	1.343	5.375	-1.404	-174.837	178.809	180.212	360.212	0.212	0.212	-0.313	173.433	353.433	353.433	-6.567	-3.13812	1.9855
-180	-150	120.473	124.212	115.315	0.002	1.343	5.347	-0.741	-175.158	179.764	180.505	360.505	0.505	0.505	-0.02	174.417	354.417	354.417	-5.583	-2.15412	2.303
-180	-140	120.227	124.117	115.656	0.01	1.343	5.914	-1.59	-175.244	179.568	181.158	361.158	1.158	1.158	0.633	173.654	353.654	353.654	-6.346	-2.91712	2.162
-180	-130	120.013	124.062	115.925	0.027	1.344	5.757	-2.674	-176.130	179.212	181.887	361.887	1.887	1.887	1.362	173.456	353.456	353.456	-6.544	-3.11512	1.5415
-180	-120	119.954	123.928	116.118	0.054	1.344	5.106	-4.05	-177.570	178.626	182.676	362.676	2.676	2.676	2.151	173.52	353.52	353.52	-6.48	-3.05112	0.528
-180	-110	120.116	123.934	115.95	0.063	1.345	3.35	-4.333	-179.528	178.545	182.878	362.878	2.878	2.878	2.353	175.195	355.195	355.195	-4.805	-1.37612	-0.4915
-180	-100	120.424	123.879	115.697	0.059	1.346	2.47	-4.715	179.665	178.09	-177.195	2.805	2.805	2.805	2.28	-184.38	-4.38	355.62	-4.38	-0.951122	-1.1225
-180	-90	120.767	123.873	115.36	0.039	1.346	0.976	-4.703	178.713	177.56	-177.737	2.263	2.263	2.263	1.738	-183.416	-3.416	356.584	-3.416	0.0128784	-1.8635
-180	-80	120.97	123.849	115.181	0.014	1.347	0.402	-4.254	179.022	177.125	-178.62	1.38	1.38	1.38	0.855	-183.276	-3.276	356.724	-3.276	0.152878	-1.926
-180	-70	121.053	123.847	115.1	0.002	1.347	-0.38	-3.967	179.151	176.502	-179.531	0.469	0.469	0.469	-0.056	-183.118	-3.118	356.882	-3.118	0.310878	-2.1735
-180	-60	120.928	123.795	115.277	0.003	1.348	0.079	-3.475	-179.368	175.972	179.447	359.447	359.447	-0.553	-1.078	175.893	355.893	355.893	-4.107	-0.678122	-1.698
-180	-50	120.575	123.764	115.661	0.011	1.348	0.648	-3.57	-178.123	175.201	178.771	358.771	358.771	-1.229	-1.754	174.553	354.553	354.553	-5.447	-2.01812	-1.461
-180	-40	120.07	123.815	116.115	0.013	1.348	1.522	-4.862	-177.151	173.812	178.673	358.673	358.673	-1.327	-1.852	172.289	352.289	352.289	-7.711	-4.28212	-1.67
-180	-30	119.462	123.841	116.697	0.005	1.348	3.029	-7.324	-176.161	171.866	179.19	359.19	359.19	-0.81	-1.335	168.837	348.837	348.837	-11.163	-7.73412	-2.1475
-180	-20	118.864	123.759	117.377	0.001	1.348	3.985	-10.684	-176.503	169.804	180.488	360.488	0.488	0.488	-0.037	165.819	345.819	345.819	-14.181	-10.7521	-3.3495
-180	-10	118.352	123.579	118.069	0.033	1.349	4.835	-14.333	-177.297	167.799	182.132	362.132	2.132	2.132	1.607	162.964	342.964	342.964	-17.036	-13.6071	-4.749
-180	0	117.783	123.364	118.853	0.058	1.347	-1.653	12.082	-178.796	170.775	177.143	357.143	357.143	-2.857	-3.382	190.878	370.878	10.878	10.878	14.3069	5.2145
-180	10	118.239	123.558	118.203	0.014	1.347	-1.924	10.309	179.422	171.037	-181.346	-1.346	358.654	-1.346	-1.871	-169.113	10.887	10.887	10.887	14.3159	4.1925
-180	20	118.81	123.658	117.532	0.001	1.347	-1.603	7.078	178.079	172.604	-179.682	0.318	0.318	0.318	-0.207	-171.001	8.999	8.999	8.999	12.4279	2.7375
-180	30	119.391	123.79	116.819	0.019	1.347	-0.232	3.3	178.175	175.107	-178.407	1.593	1.593	1.593	1.068	-174.875	5.125	5.125	5.125	8.55388	1.534
-180	40	119.992	123.898	116.11	0.036	1.347	1.929	0.31	179.759	177.52	-177.83	2.17	2.17	2.17	1.645	-179.449	0.551	0.551	0.551	3.97988	1.1195
-180	50	120.51	123.9	115.59	0.036	1.348	2.711	-1.092	-179.467	178.914	182.178	362.178	2.178	2.178	1.653	178.375	358.375	358.375	-1.625	1.80388	0.8095
-180	60	120.776	123.922	115.302	0.017	1.348	3.374	-1.195	-178.123	179.698	181.497	361.497	1.497	1.497	0.972	176.928	356.928	356.928	-3.072	0.356878	1.0895
-180	70	120.982	123.834	115.184	0.002	1.348	3.191	-0.978	-177.409	179.622	180.6	360.6	0.6	0.6	0.075	176.431	356.431	356.431	-3.569	-0.140122	1.1065
-180	80	121.008	123.845	115.147	0.001	1.347	2.743	-0.257	-176.770	179.255	179.513	359.513	359.513	-0.487	-1.012	176.513	356.513	356.513	-3.487	-0.0581216	1.243
-180	90	120.8	123.846	115.354	0.013	1.346	1.633	0.276	-177.064	178.973	178.697	358.697	358.697	-1.303	-1.828	177.34	357.34	357.34	-2.66	0.768878	0.9545
-180	100	120.39	123.933	115.677	0.03	1.345	0.908	0.568	-177.097	178.573	178.005	358.005	358.005	-1.995	-2.52	177.665	357.665	357.665	-2.335	1.09388	0.738
-180	110	120.116	123.965	115.919	0.032	1.344	-0.498	-0.025	-178.452	177.929	177.954	357.954	357.954	-2.046	-2.571	178.427	358.427	358.427	-1.573	1.85588	-0.2615
-180	120	120.099	123.952	115.949	0.015	1.343	-1.892	-1.238	179.51	177.36	-181.402	-1.402	358.598	-1.402	-1.927	-180.748	-0.748	359.252	-0.748	2.68088	-1.565
-180	130	119.951	124.056	115.993	0.009	1.343	1.795	-1.627	-178.577	177.3	180.372	360.372	0.372	0.372	-0.153	176.95	356.95	356.95	-3.05	0.378878	0.084
-180	140	120.157	124.026	115.817	0	1.343	-2.786	-3.142	177.384	176.688	-180.17	-0.17	359.83	-0.17	-0.695	-180.526	-0.526	359.474	-0.526	2.90288	-2.964
-180	150	120.425	124.034	115.541	0.002	1.343	-1.914	-3.905	177.631	176.551	-179.545	0.455	0.455	0.455	-0.07	-181.536	-1.536	358.464	-1.536	1.89288	-2.9095
-180	160	120.71	124.026	115.264	0.006	1.343	-1.416	-3.951	177.736	176.897	-179.152	0.848	0.848	0.848	0.323	-181.687	-1.687	358.313	-1.687	1.74188	-2.6835
-180	170	120.92	124.054	115.026	0.007	1.343	-0.785	-3.478	178.269	177.468	-179.054	0.946	0.946	0.946	0.421	-181.747	-1.747	358.253	-1.747	1.68188	-2.1315
-180	180	121.005	124.026	114.969	0.003	1.343	1.388	-2.403	-179.151	178.137	180.539	360.539	0.539	0.539	0.014	176.748	356.748	356.748	-3.252	0.176878	-0.5075
-150	-180	121.065	124.03	114.905	0.02	1.343	2.596	-3.924	-178.980	177.612	181.576	361.576	1.576	1.576	1.051	175.056	355.056	355.056	-4.944	-1.51512	-0.664
-150	-170	121.093	124.088	114.819	0.01	1.344	3.884	-2.312	-177.231	178.804	181.115	361.115	1.115	1.115	0.59	174.919	354.919	354.919	-5.081	-1.65212	0.786
-150	-160	121.064	124.061	114.875	0.009	1.344	5.228	-2.097	-175.853	178.983	181.081	361.081	1.081	1.081	0.556	173.756	353.756	353.756	-6.244	-2.81512	1.5655
-150	-150	120.968	123.967	115.065	0.009	1.345	6.346	-1.802	-174.703	179.248	181.049	361.049	1.049	1.049	0.524	172.901	352.901	352.901	-7.099	-3.67012	2.272
-150	-140	120.903	123.859	115.238	0.008	1.345	6.291	-1.792	-174.732	179.231	181.023	361.023	1.023	1.023	0.498	172.94	352.94	352.94	-7.06	-3.63112	2.2495
-150	-130	121.031	123.952	115.017	0	1.346	4.963	-0.417	-175.280	179.826	180.243	360.243	0.243	0.243	-0.282	174.863	354.863	354.863	-5.137	-1.70812	2.273
-150	-120	120.964	123.815	115.221	0.007	1.346	4.006	-2.325	-176.942	178.622	180.948	360.948	0.948	0.948	0.423	174.617	354.617	354.617	-5.383	-1.95412	0.8405
-150	-110	120.882	123.724	115.394	0.022	1.347	2.991	-3.858	-178.693	177.826	181.684	361.684	1.684	1.684	1.159	174.835	354.835	354.835	-5.165	-1.73612	-0.4335
-150	-100	120.971	123.754	115.275	0.037	1.347	1.964	-5.1	179.768	177.096	-177.804	2.196	2.196	2.196	1.671	-184.868	-4.868	355.132	-4.868	-1.43912	-1.568
-150	-90	121.145	123.74	115.115	0.054	1.348	1.533	-7.151	178.879	175.503	-177.346	2.654	2.654	2.654	2.129	-186.03	-6.03	353.97	-6.03	-2.60112	-2.809
-150	-80	121.249	123.726	115.025	0.054	1.349	0.484	-8.291	177.849	174.344	-177.365	2.635	2.635	2.635	2.11	-186.14	-6.14	353.86	-6.14	-2.71112	-3.9035
-150	-70	121.232	123.625	115.143	0.038	1.349	0.576	-9.95	178.37	172.257	-177.794	2.206	2.206	2.206	1.681	-188.32	-8.32	351.68	-8.32	-4.89112	-4.687
-150	-60	121.01	123.634	115.356	0.011	1.35	1.445	-10.879	-179.780	170.347	181.225	361.225	1.225	1.225	0.7	168.901	348.901	348.901	-11.099	-7.67012	-4.717
-150	-50	120.553	123.499	115.948	0.002	1.351	2.151	-12.093	-178.401	168.458	180.552	360.552	0.552	0.552	0.027	166.308	346.308	346.308	-13.692	-10.2631	-4.971
-150	-40	119.693	123.339	116.968	0	1.351	3.623	-12.59	-176.177	167.21	179.8	359.8	359.8	-0.2	-0.725	163.587	343.587	343.587	-16.413	-12.9841	-4.4835
-150	-30	118.332	123.246	118.422	0.151	1.346	-1.641	6.382	-177.093	178.166	175.452	355.452	355.452	-4.548	-5.073	183.475	363.475	3.475	3.475	6.90388	2.3705
-150	-20	118.136	123.387	118.477	0.13	1.345	-2.597	8.636	-178.371	175.591	175.774	355.774	355.774	-4.226	-4.751	187.007	367.007	7.007	7.007	10.4359	3.0195
-150	-10	118.163	123.84	117.997	0.099	1.345	-2.396	-5.1	-178.694	173.734	176.298	356.298	356.298	-3.702	-4.227	173.594	353.594	353.594	-6.406	-2.97712	-3.748
-150	0	118.357	123.951	117.692	0.027	1.345	-1.806	7.12	-179.864	174.821	178.058	358.058	358.058	-1.942	-2.467	186.984	366.984	6.984	6.984	10.4129	2.657
-150	10	118.701	123.978	117.321	0	1.344	-0.389	3.722	179.822	176.489	-180.211	-0.211	359.789	-0.211	-0.736	-176.1	3.9	3.9	3.9	7.32888	1.6665
-150	20	119.02	124.285	116.695	0.012	1.345	0.336	0.708	179.046	178.001	-178.71	1.29	1.29	1.29	0.765	-178.338	1.662	1.662	1.662	5.09088	0.522
-150	30	119.499	124.15	116.351	0.058	1.345	1.546	-3.158	178.754	179.634	-177.208	2.792	2.792	2.792	2.267	-181.912	-1.912	358.088	-1.912	1.51688	-0.806
-150	40	119.979	124.058	115.963	0.106	1.346	2.362	-5.871	178.591	177.9	-176.229	3.771	3.771	3.771	3.246	-184.462	-4.462	355.538	-4.462	-1.03312	-1.7545
-150	50	120.39	123.892	115.718	0.113	1.346	3.013	-6.992	179.139	176.883	-176.126	3.874	3.874	3.874	3.349	-186.131	-6.131	353.869	-6.131	-2.70212	-1.9895
-150	60	120.662	123.938	115.4	0.046	1.347	4.268	-5.087	-178.177	177.359	182.445	362.445	2.445	2.445	1.92	173.09	353.09	353.09	-6.91	-3.48112	-0.4095
-150	70	120.818	123.973	115.209	0.006	1.347	4.259	-2.93	-176.669	177.995	180.928	360.928	0.928	0.928	0.403	173.739	353.739	353.739	-6.261	-2.83212	0.6645
-150	80	120.795	123.907	115.298	0.001	1.347	3.437	-1.087	-176.093	178.443	179.53	359.53	359.53	-0.47	-0.995	175.006	355.006	355.006	-4.994	-1.56512	1.175
-150	90	120.583	123.925	115.492	0.019	1.346	3.164	-0.229	-175.250	178.185	178.414	358.414	358.414	-1.586	-2.111	175.021	355.021	355.021	-4.979	-1.55012	1.4675
-150	100	120.211	123.9	115.889	0.034	1.345	1.712	0.485	-176.162	178.358	177.874	357.874	357.874	-2.126	-2.651	176.647	356.647	356.647	-3.353	0.0758784	1.0985
-150	110	119.882	124.042	116.076	0.026	1.344	0.543	-0.276	-177.585	177.852	178.128	358.128	358.128	-1.872	-2.397	177.309	357.309	357.309	-2.691	0.737878	0.1335
-150	120	119.792	124.01	116.198	0.011	1.344	-0.666	-1.464	-179.468	177.338	178.802	358.802	358.802	-1.198	-1.723	178.004	358.004	358.004	-1.996	1.43288	-1.065
-150	130	119.923	124.025	116.052	0.001	1.343	-1.849	-2.7	178.342	177.108	-180.191	-0.191	359.809	-0.191	-0.716	-181.042	-1.042	358.958	-1.042	2.38688	-2.2745
-150	140	120.078	124.084	115.838	0.004	1.343	-2.178	-3.899	177.142	176.781	-179.32	0.68	0.68	0.68	0.155	-181.041	-1.041	358.959	-1.041	2.38788	-3.0385
-150	150	120.301	124.145	115.554	0.014	1.343	-2.473	-4.433	176.192	176.902	-178.665	1.335	1.335	1.335	0.81	-180.625	-0.625	359.375	-0.625	2.80388	-3.453
-150	160	120.591	124.065	115.344	0.024	1.343	-1.209	-4.833	177.019	176.939	-178.228	1.772	1.772	1.772	1.247	-181.852	-1.852	358.148	-1.852	1.57688	-3.021
-150	170	120.885	124.004	115.111	0.029	1.343	0.713	-5.14	178.772	176.801	-178.059	1.941	1.941	1.941	1.416	-183.912	-3.912	356.088	-3.912	-0.483122	-2.2135
-150	180	121.065	124.03	114.905	0.02	1.343	2.596	-3.924	-178.98	177.612	181.576	361.576	1.576	1.576	1.051	175.056	355.056	355.056	-4.944	-1.51512	-0.664
-120	-180	121.698	123.948	114.354	0.031	1.346	2.04	-4.626	-179.976	177.391	182.016	362.016	2.016	2.016	1.491	175.35	355.35	355.35	-4.65	-1.22112	-1.293
-120	-170	121.961	123.884	114.155	0.001	1.347	4.249	-2.284	-176.232	178.197	180.481	360.481	0.481	0.481	-0.044	173.948	353.948	353.948	-6.052	-2.62312	0.9825
-120	-160	121.856	123.909	114.235	0.002	1.348	3.781	-0.119	-175.693	179.355	179.474	359.474	359.474	-0.526	-1.051	175.574	355.574	355.574	-4.426	-0.997122	1.831
-120	-150	121.626	123.831	114.543	0.005	1.347	4.361	0.173	-174.871	179.406	179.232	359.232	359.232	-0.768	-1.293	175.044	355.044	355.044	-4.956	-1.52712	2.267
-120	-140	121.299	123.863	114.838	0.005	1.348	5.423	0.054	-173.752	179.228	179.175	359.175	359.175	-0.825	-1.35	173.806	353.806	353.806	-6.194	-2.76512	2.7385
-120	-130	121.046	123.686	115.268	0	1.347	4.987	-1.246	-175.073	178.814	180.06	360.06	0.06	0.06	-0.465	173.827	353.827	353.827	-6.173	-2.74412	1.8705
-120	-120	120.823	123.805	115.372	0.007	1.348	3.331	-2.133	-177.575	178.773	180.906	360.906	0.906	0.906	0.381	175.442	355.442	355.442	-4.558	-1.12912	0.599
-120	-110	120.81	123.692	115.498	0.025	1.347	2.753	-3.852	-179.053	177.954	181.806	361.806	1.806	1.806	1.281	175.201	355.201	355.201	-4.799	-1.37012	-0.5495
-120	-100	120.912	123.753	115.335	0.046	1.347	2.184	-5.3	179.744	177.141	-177.56	2.44	2.44	2.44	1.915	-185.044	-5.044	354.956	-5.044	-1.61512	-1.558
-120	-90	120.994	123.658	115.348	0.059	1.347	1.467	-7.005	178.695	175.767	-177.228	2.772	2.772	2.772	2.247	-185.7	-5.7	354.3	-5.7	-2.27112	-2.769
-120	-80	121.103	123.531	115.366	0.06	1.348	1.791	-9.054	178.982	173.754	-177.191	2.809	2.809	2.809	2.284	-188.036	-8.036	351.964	-8.036	-4.60712	-3.6315
-120	-70	120.963	123.418	115.619	0.031	1.348	0.861	-9.059	178.85	172.952	-177.989	2.011	2.011	2.011	1.486	-187.909	-7.909	352.091	-7.909	-4.48012	-4.099
-120	-60	120.676	123.437	115.887	0	1.348	0.719	-7.155	-179.560	173.124	180.279	360.279	0.279	0.279	-0.246	172.405	352.405	352.405	-7.595	-4.16612	-3.218
-120	-50	120.001	123.394	116.605	0.032	1.347	-1.003	-1.477	-178.972	176.493	177.969	357.969	357.969	-2.031	-2.556	177.495	357.495	357.495	-2.505	0.923878	-1.24
-120	-40	119.468	123.358	117.174	0.092	1.345	-2.06	3.352	-178.545	179.836	176.485	356.485	356.485	-3.515	-4.04	181.897	361.897	1.897	1.897	5.32588	0.646
-120	-30	119.033	123.798	117.169	0.172	1.345	-1.737	8.377	-176.918	176.442	175.181	355.181	355.181	-4.819	-5.344	185.295	365.295	5.295	5.295	8.72388	3.32
-120	-20	118.821	123.875	117.304	0.108	1.344	-1.422	6.9	-177.602	176.92	176.18	356.18	356.18	-3.82	-4.345	184.502	364.502	4.502	4.502	7.93088	2.739
-120	-10	118.593	124.237	117.17	0.057	1.343	-1.662	6.242	-178.887	176.533	177.225	357.225	357.225	-2.775	-3.3	185.129	365.129	5.129	5.129	8.55788	2.29
-120	10	118.834	124.183	116.983	0.01	1.342	0.959	-1.795	179.811	179.352	-178.852	1.148	1.148	1.148	0.623	-181.606	-1.606	358.394	-1.606	1.82288	-0.418
-120	20	118.913	124.323	116.764	0.046	1.343	2.54	-4.641	-179.994	177.893	182.534	362.534	2.534	2.534	2.009	175.353	355.353	355.353	-4.647	-1.21812	-1.0505
-120	30	119.33	124.112	116.558	0.109	1.344	3.507	-7.659	179.687	176.161	-176.18	3.82	3.82	3.82	3.295	-187.346	-7.346	352.654	-7.346	-3.91712	-2.076
-120	40	119.72	124.047	116.233	0.133	1.345	4.121	-8.284	179.9	175.936	-175.779	4.221	4.221	4.221	3.696	-188.184	-8.184	351.816	-8.184	-4.75512	-2.0815
-120	50	120.226	123.94	115.834	0.102	1.346	4.489	-7.024	-179.207	176.672	183.696	363.696	3.696	3.696	3.171	172.183	352.183	352.183	-7.817	-4.38812	-1.2675
-120	60	120.645	123.851	115.504	0.04	1.347	4.84	-4.729	-177.467	177.578	182.307	362.307	2.307	2.307	1.782	172.738	352.738	352.738	-7.262	-3.83312	0.0555
-120	70	120.903	123.831	115.266	0.007	1.347	4.278	-2.64	-176.626	178.265	180.904	360.904	0.904	0.904	0.379	173.986	353.986	353.986	-6.014	-2.58512	0.819
-120	80	120.944	123.854	115.202	0.002	1.347	3.655	-0.728	-175.827	178.754	179.482	359.482	359.482	-0.518	-1.043	175.099	355.099	355.099	-4.901	-1.47212	1.4635
-120	90	120.704	123.861	115.435	0.016	1.347	3.72	-0.26	-174.811	178.271	178.531	358.531	358.531	-1.469	-1.994	174.551	354.551	354.551	-5.449	-2.02012	1.73
-120	100	120.336	123.898	115.766	0.02	1.346	2.654	-0.252	-175.675	178.077	178.329	358.329	358.329	-1.671	-2.196	175.423	355.423	355.423	-4.577	-1.14812	1.201
-120	110	120.053	123.974	115.973	0.013	1.345	1.764	-0.98	-176.936	177.72	178.7	358.7	358.7	-1.3	-1.825	175.956	355.956	355.956	-4.044	-0.615122	0.392
-120	120	119.906	123.991	116.103	0.001	1.345	-0.49	-2.003	179.921	177.586	-180.411	-0.411	359.589	-0.411	-0.936	-181.924	-1.924	358.076	-1.924	1.50488	-1.2465
-120	130	119.959	124.042	115.999	0.002	1.345	-1.079	-3.033	178.439	177.45	-179.518	0.482	0.482	0.482	-0.043	-181.472	-1.472	358.528	-1.472	1.95688	-2.056
-120	140	120.184	124.116	115.7	0.016	1.344	-1.578	-4.566	176.956	176.899	-178.534	1.466	1.466	1.466	0.941	-181.522	-1.522	358.478	-1.522	1.90688	-3.072
-120	150	120.475	124.049	115.476	0.04	1.345	-1.262	-5.652	176.435	176.651	-177.697	2.303	2.303	2.303	1.778	-182.087	-2.087	357.913	-2.087	1.34188	-3.457
-120	160	120.827	124.025	115.148	0.057	1.345	-1.165	-5.694	176.088	177.053	-177.253	2.747	2.747	2.747	2.222	-181.782	-1.782	358.218	-1.782	1.64688	-3.4295
-120	170	121.305	124.014	114.681	0.052	1.346	-0.229	-5.156	177.187	177.429	-177.416	2.584	2.584	2.584	2.059	-182.343	-2.343	357.657	-2.343	1.08588	-2.6925
-120	180	121.698	123.948	114.354	0.031	1.346	2.04	-4.626	-179.976	177.391	182.016	362.016	2.016	2.016	1.491	175.35	355.35	355.35	-4.65	-1.22112	-1.293
-60	-180	122.389	123.842	113.769	0.08	1.349	3.322	-5.751	-179.875	177.446	183.197	363.197	3.197	3.197	2.672	174.124	354.124	354.124	-5.876	-2.44712	-1.2145
-60	-170	122.461	123.687	113.852	0.069	1.35	6.809	-5.912	-176.156	177.054	182.965	362.965	2.965	2.965	2.44	170.244	350.244	350.244	-9.756	-6.32712	0.4485
-60	-160	122.514	123.759	113.727	0.045	1.35	7.539	-3.985	-174.831	178.386	182.37	362.37	2.37	2.37	1.845	170.846	350.846	350.846	-9.154	-5.72512	1.777
-60	-150	122.504	123.622	113.874	0.036	1.35	7.5	-3.428	-174.634	178.705	182.134	362.134	2.134	2.134	1.609	171.206	351.206	351.206	-8.794	-5.36512	2.036
-60	-140	122.403	123.451	114.146	0.02	1.351	6.695	-2.491	-174.895	179.098	181.59	361.59	1.59	1.59	1.065	172.404	352.404	352.404	-7.596	-4.16712	2.102
-60	-130	122.363	123.297	114.34	0.008	1.351	6.039	-2.281	-174.937	178.695	180.976	360.976	0.976	0.976	0.451	172.656	352.656	352.656	-7.344	-3.91512	1.879
-60	-120	122.32	123.26	114.42	0	1.351	3.896	-1.263	-176.157	178.79	180.053	360.053	0.053	0.053	-0.472	174.894	354.894	354.894	-5.106	-1.67712	1.3165
-60	-110	122.23	123.287	114.483	0.004	1.351	2.235	-1.246	-177.094	178.082	179.329	359.329	359.329	-0.671	-1.196	175.848	355.848	355.848	-4.152	-0.723122	0.4945
-60	-100	122.184	123.32	114.496	0.018	1.351	0.04	-0.804	-178.428	177.665	178.468	358.468	358.468	-1.532	-2.057	177.624	357.624	357.624	-2.376	1.05288	-0.382
-60	-90	122.013	123.304	114.683	0.043	1.35	-2.109	-0.036	-179.741	177.595	177.632	357.632	357.632	-2.368	-2.893	179.705	359.705	359.705	-0.295	3.13388	-1.0725
-60	-80	121.606	123.531	114.863	0.098	1.35	-3.557	1.652	179.986	178.108	-183.543	-3.543	356.457	-3.543	-4.068	-178.334	1.666	1.666	1.666	5.09488	-0.9525
-60	-70	121.259	123.619	115.122	0.148	1.349	-4.495	2.973	179.899	178.578	-184.394	-4.394	355.606	-4.394	-4.919	-176.926	3.074	3.074	3.074	6.50288	-0.761
-60	-60	120.867	123.682	115.451	0.17	1.347	-4.094	3.879	-179.379	179.164	175.285	355.285	355.285	-4.715	-5.24	183.258	363.258	3.258	3.258	6.68688	-0.1075
-60	-50	120.433	123.766	115.801	0.155	1.346	-3.077	4.214	-178.555	179.692	175.478	355.478	355.478	-4.522	-5.047	182.769	362.769	2.769	2.769	6.19788	0.5685
-60	-40	119.758	124.075	116.167	0.131	1.345	-1.643	3.867	-177.461	179.685	175.818	355.818	355.818	-4.182	-4.707	181.328	361.328	1.328	1.328	4.75688	1.112
-60	-30	119.151	124.065	116.784	0.056	1.343	0.132	0.587	-177.107	177.826	177.239	357.239	357.239	-2.761	-3.286	177.694	357.694	357.694	-2.306	1.12288	0.3595
-60	-20	118.504	124.056	117.44	0.011	1.342	1.227	-2.202	-177.511	176.536	178.738	358.738	358.738	-1.262	-1.787	175.309	355.309	355.309	-4.691	-1.26212	-0.4875
-60	-10	117.644	124.071	118.285	0	1.341	1.822	-2.939	-178.015	176.898	179.837	359.837	359.837	-0.163	-0.688	175.076	355.076	355.076	-4.924	-1.49512	-0.5585
-60	0	117.075	123.868	119.057	0.007	1.34	1.814	-2.536	-179.209	178.487	181.023	361.023	1.023	1.023	0.498	176.673	356.673	356.673	-3.327	0.101878	-0.361
-60	10	116.773	123.683	119.544	0.001	1.34	-0.718	8.106	179.215	171.827	-179.933	0.067	0.067	0.067	-0.458	-171.109	8.891	8.891	8.891	12.3199	3.694
-60	20	116.953	123.805	119.242	-0.001	1.342	-1.844	13.282	178.108	166.67	-179.952	0.048	0.048	0.048	-0.477	-164.826	15.174	15.174	15.174	18.6029	5.719
-60	30	117.211	124.153	118.636	0.011	1.341	-0.651	9.905	178.167	168.912	-178.818	1.182	1.182	1.182	0.657	-168.262	11.738	11.738	11.738	15.1669	4.627
-60	40	117.806	124	118.194	0.043	1.341	0.671	4.57	178.237	172.995	-177.566	2.434	2.434	2.434	1.909	-173.667	6.333	6.333	6.333	9.76188	2.6205
-60	50	118.485	123.862	117.653	0.075	1.341	2.451	-1.043	179.236	177.828	-176.785	3.215	3.215	3.215	2.69	-180.279	-0.279	359.721	-0.279	3.14988	0.704
-60	60	119.043	123.855	117.102	0.147	1.342	3.325	-6.732	179.536	177.057	-176.211	3.789	3.789	3.789	3.264	-186.268	-6.268	353.732	-6.268	-2.83912	-1.7035
-60	70	119.628	123.799	116.573	0.121	1.343	4.289	-11.968	-179.732	172.053	184.021	364.021	4.021	4.021	3.496	167.764	347.764	347.764	-12.236	-8.80712	-3.8395
-60	80	120.068	123.791	116.141	0.102	1.344	4.694	-14.985	-178.997	168.706	183.691	363.691	3.691	3.691	3.166	164.012	344.012	344.012	-15.988	-12.5591	-5.1455
-60	90	120.274	123.819	115.907	0.061	1.345	4.794	-15.371	-178.037	167.461	182.831	362.831	2.831	2.831	2.306	162.666	342.666	342.666	-17.334	-13.9051	-5.2885
-60	100	120.329	123.833	115.838	0.026	1.345	4.331	-13.383	-177.514	168.462	181.845	361.845	1.845	1.845	1.32	164.131	344.131	344.131	-15.869	-12.4401	-4.526
-60	110	120.294	123.799	115.907	0.013	1.344	2.537	-10.5	-178.797	170.834	181.334	361.334	1.334	1.334	0.809	168.297	348.297	348.297	-11.703	-8.27412	-3.9815
-60	120	120.464	123.795	115.741	0.012	1.344	0.73	-7.628	179.485	173.618	-178.755	1.245	1.245	1.245	0.72	-187.113	-7.113	352.887	-7.113	-3.68412	-3.449
-60	130	120.834	123.823	115.343	0.031	1.345	-0.592	-7.04	177.404	174.964	-177.996	2.004	2.004	2.004	1.479	-184.444	-4.444	355.556	-4.444	-1.01512	-3.816
-60	140	121.125	123.906	114.969	0.052	1.346	-1.357	-6.78	176.046	175.817	-177.403	2.597	2.597	2.597	2.072	-182.826	-2.826	357.174	-2.826	0.602878	-4.0685
-60	150	121.531	123.913	114.556	0.085	1.347	-0.31	-7.182	176.386	176.122	-176.696	3.304	3.304	3.304	2.779	-183.568	-3.568	356.432	-3.568	-0.139122	-3.746
-60	160	121.942	123.865	114.193	0.111	1.347	0.64	-7.493	176.867	176.28	-176.227	3.773	3.773	3.773	3.248	-184.36	-4.36	355.64	-4.36	-0.931122	-3.4265
-60	170	122.204	123.986	113.81	0.101	1.348	1.862	-6.429	178.28	177.152	-176.418	3.582	3.582	3.582	3.057	-184.709	-4.709	355.291	-4.709	-1.28012	-2.2835
-60	180	122.389	123.842	113.769	0.08	1.349	3.322	-5.751	-179.875	177.446	183.197	363.197	3.197	3.197	2.672	174.124	354.124	354.124	-5.876	-2.44712	-1.2145
60	-180	122.372	123.845	113.783	0.038	1.348	-0.228	0.653	-178.020	178.445	177.792	357.792	357.792	-2.208	-2.733	178.673	358.673	358.673	-1.327	2.10188	0.2125
60	-170	122.197	123.903	113.9	0.049	1.348	1.253	1.529	-176.240	179.022	177.493	357.493	357.493	-2.507	-3.032	177.769	357.769	357.769	-2.231	1.19788	1.391
60	-160	121.943	123.873	114.184	0.045	1.347	3.332	1.495	-174.259	179.086	177.591	357.591	357.591	-2.409	-2.934	175.754	355.754	355.754	-4.246	-0.817122	2.4135
60	-150	121.577	123.912	114.511	0.037	1.347	3.912	1.851	-173.898	179.661	177.81	357.81	357.81	-2.19	-2.715	175.749	355.749	355.749	-4.251	-0.822122	2.8815
60	-140	121.166	123.851	114.983	0.017	1.346	4.968	1.109	-173.568	179.645	178.536	358.536	358.536	-1.464	-1.989	174.677	354.677	354.677	-5.323	-1.89412	3.0385
60	-130	120.736	123.927	115.337	0.006	1.345	2.861	2.462	-176.243	178.433	179.104	359.104	359.104	-0.896	-1.421	178.705	358.705	358.705	-1.295	2.13388	2.6615
60	-120	120.423	124.074	115.503	0.001	1.344	1.702	3.472	-177.979	176.847	179.681	359.681	359.681	-0.319	-0.844	181.451	361.451	1.451	1.451	4.87988	2.587
60	-110	120.271	123.899	115.83	0.001	1.343	0.043	5.679	-179.652	174.626	179.695	359.695	359.695	-0.305	-0.83	185.331	365.331	5.331	5.331	8.75988	2.861
60	-100	120.286	123.857	115.857	0.004	1.343	-2.063	8.898	178.694	171.858	-180.757	-0.757	359.243	-0.757	-1.282	-169.796	10.204	10.204	10.204	13.6329	3.4175
60	-90	120.346	123.864	115.79	0.024	1.344	-3.669	12.107	178.131	169.693	-181.8	-1.8	358.2	-1.8	-2.325	-166.024	13.976	13.976	13.976	17.4049	4.219
60	-80	120.055	124.003	115.942	0.061	1.344	-3.509	12.084	179.347	170.772	-182.856	-2.856	357.144	-2.856	-3.381	-167.263	12.737	12.737	12.737	16.1659	4.2875
60	-70	119.668	123.763	116.569	0.079	1.342	-2.77	9.265	-179.521	173.983	176.751	356.751	356.751	-3.249	-3.774	188.786	368.786	8.786	8.786	12.2149	3.2475
60	-60	119.137	123.812	117.051	0.08	1.341	-1.622	4.527	-178.4	178.695	176.778	356.778	356.778	-3.222	-3.747	182.927	362.927	2.927	2.927	6.35588	1.4525
60	-50	118.488	123.935	117.577	0.065	1.341	-0.056	-0.726	-177.072	176.29	177.016	357.016	357.016	-2.984	-3.509	176.346	356.346	356.346	-3.654	-0.225122	-0.391
60	-40	117.938	123.876	118.186	0.025	1.341	1.233	-6.931	-176.910	171.212	178.143	358.143	358.143	-1.857	-2.382	169.979	349.979	349.979	-10.021	-6.59212	-2.849
60	-30	117.433	123.837	118.73	0.001	1.342	2.133	-12.518	-177.471	167.086	179.604	359.604	359.604	-0.396	-0.921	164.953	344.953	344.953	-15.047	-11.6181	-5.1925
60	-20	116.96	123.853	119.187	0.004	1.343	3.115	-15.853	-177.626	164.888	180.741	360.741	0.741	0.741	0.216	161.773	341.773	341.773	-18.227	-14.7981	-6.369
60	-10	116.737	123.757	119.506	0.014	1.343	3.455	-14.97	-177.992	166.477	181.447	361.447	1.447	1.447	0.922	163.022	343.022	343.022	-16.978	-13.5491	-5.7575
60	10	117.639	124.014	118.347	0.006	1.341	0.37	-0.483	179.501	179.615	-179.131	0.869	0.869	0.869	0.344	-179.984	0.016	0.016	0.016	3.44488	-0.0565
60	20	118.351	124.102	117.547	0.035	1.342	1.625	-1.912	179.455	179.743	-177.83	2.17	2.17	2.17	1.645	-181.367	-1.367	358.633	-1.367	2.06188	-0.1435
60	30	119.046	124.154	116.8	0.092	1.344	2.54	-4.271	179.006	179.263	-176.466	3.534	3.534	3.534	3.009	-183.277	-3.277	356.723	-3.277	0.151878	-0.8655
60	40	119.774	124.011	116.215	0.182	1.345	4.478	-7.878	179.541	177.059	-175.063	4.937	4.937	4.937	4.412	-187.419	-7.419	352.581	-7.419	-3.99012	-1.7
60	50	120.32	123.927	115.753	0.231	1.347	5.98	-8.894	-179.551	176.636	185.531	365.531	5.531	5.531	5.006	170.657	350.657	350.657	-9.343	-5.91412	-1.457
60	60	120.767	123.713	115.52	0.249	1.348	6.733	-8.532	-178.981	177.181	185.714	365.714	5.714	5.714	5.189	170.449	350.449	350.449	-9.551	-6.12212	-0.8995
60	70	121.285	123.594	115.121	0.192	1.35	7.76	-7.248	-177.233	177.745	184.993	364.993	4.993	4.993	4.468	169.985	349.985	349.985	-10.015	-6.58612	0.256
60	80	121.626	123.293	115.081	0.149	1.35	6.305	-6.044	-178.076	178.337	184.381	364.381	4.381	4.381	3.856	172.032	352.032	352.032	-7.968	-4.53912	0.1305
60	90	121.991	123.321	114.688	0.084	1.351	5.11	-4.836	-178.184	178.457	183.294	363.294	3.294	3.294	2.769	173.348	353.348	353.348	-6.652	-3.22312	0.137
60	100	122.089	123.385	114.526	0.049	1.351	4.24	-4.374	-178.272	178.138	182.512	362.512	2.512	2.512	1.987	173.898	353.898	353.898	-6.102	-2.67312	-0.067
60	110	122.295	123.4	114.305	0.022	1.351	1.898	-3.924	-179.784	177.758	181.682	361.682	1.682	1.682	1.157	175.86	355.86	355.86	-4.14	-0.711122	-1.013
60	120	122.363	123.291	114.346	0.009	1.35	-0.131	-3.918	178.753	177.198	-178.884	1.116	1.116	1.116	0.591	-182.671	-2.671	357.329	-2.671	0.757878	-2.0245
60	130	122.474	123.335	114.191	0.001	1.35	-1.595	-3.631	178.05	176.724	-179.645	0.355	0.355	0.355	-0.17	-181.681	-1.681	358.319	-1.681	1.74788	-2.613
60	140	122.391	123.472	114.137	0.002	1.35	-3.095	-3.042	177.27	176.593	-180.365	-0.365	359.635	-0.365	-0.89	-180.312	-0.312	359.688	-0.312	3.11688	-3.0685
60	150	122.48	123.606	113.914	0.005	1.349	-3.867	-2.231	176.962	176.941	-180.829	-0.829	359.171	-0.829	-1.354	-179.193	0.807	0.807	0.807	4.23588	-3.049
60	160	122.468	123.755	113.777	0.016	1.349	-4.149	-0.98	177.232	177.639	-181.381	-1.381	358.619	-1.381	-1.906	-178.212	1.788	1.788	1.788	5.21688	-2.5645
60	170	122.499	123.819	113.682	0.02	1.349	-2.383	-0.857	179.19	177.57	-181.573	-1.573	358.427	-1.573	-2.098	-180.047	-0.047	359.953	-0.047	3.38188	-1.62
60	180	122.372	123.845	113.783	0.038	1.348	-0.228	0.653	-178.020	178.445	177.792	357.792	357.792	-2.208	-2.733	178.673	358.673	358.673	-1.327	2.10188	0.2125
120	-180	121.681	123.945	114.374	0.003	1.347	0.271	-1.081	-179.201	178.392	179.472	359.472	359.472	-0.528	-1.053	178.12	358.12	358.12	-1.88	1.54888	-0.405
120	-170	121.298	124.042	114.66	0.016	1.346	2.512	0.275	-176.027	178.813	178.539	358.539	358.539	-1.461	-1.986	176.302	356.302	356.302	-3.698	-0.269122	1.3935
120	-160	120.906	124.011	115.083	0.021	1.345	3.967	0.844	-174.362	179.173	178.329	358.329	358.329	-1.671	-2.196	175.206	355.206	355.206	-4.794	-1.36512	2.4055
120	-150	120.597	124.05	115.353	0.011	1.345	4.695	0.544	-174.069	179.307	178.764	358.764	358.764	-1.236	-1.761	174.613	354.613	354.613	-5.387	-1.95812	2.6195
120	-140	120.215	124.021	115.764	0.002	1.345	4.923	-0.213	-174.524	179.233	179.447	359.447	359.447	-0.553	-1.078	174.311	354.311	354.311	-5.689	-2.26012	2.355
120	-130	119.998	123.965	116.037	0.002	1.345	3.942	-1.625	-176.595	178.912	180.537	360.537	0.537	0.537	0.012	174.97	354.97	354.97	-5.03	-1.60112	1.1585
120	-120	119.933	123.909	116.158	0.015	1.345	3.407	-2.689	-177.974	178.692	181.381	361.381	1.381	1.381	0.856	175.285	355.285	355.285	-4.715	-1.28612	0.359
120	-110	120.073	123.889	116.038	0.033	1.345	2.427	-3.644	-179.680	178.463	182.107	362.107	2.107	2.107	1.582	176.036	356.036	356.036	-3.964	-0.535122	-0.6085
120	-100	120.31	123.832	115.858	0.049	1.346	1.039	-4.524	178.474	178.041	-177.435	2.565	2.565	2.565	2.04	-182.998	-2.998	357.002	-2.998	0.430878	-1.7425
120	-90	120.61	123.86	115.53	0.038	1.347	-0.169	-4.194	177.605	178.032	-177.774	2.226	2.226	2.226	1.701	-181.799	-1.799	358.201	-1.799	1.62988	-2.1815
120	-80	120.948	123.726	115.326	0.019	1.347	-0.644	-4.07	177.739	177.547	-178.383	1.617	1.617	1.617	1.092	-181.809	-1.809	358.191	-1.809	1.61988	-2.357
120	-70	120.982	123.768	115.25	0	1.347	-0.472	-2.577	179.384	177.566	-179.856	0.144	0.144	0.144	-0.381	-181.961	-1.961	358.039	-1.961	1.46788	-1.5245
120	-60	120.622	123.888	115.49	0.02	1.346	-1.406	0.52	-179.805	178.919	178.399	358.399	358.399	-1.601	-2.126	180.325	360.325	0.325	0.325	3.75388	-0.443
120	-50	120.221	123.883	115.896	0.057	1.346	-1.264	2.503	-178.505	179.744	177.241	357.241	357.241	-2.759	-3.284	181.008	361.008	1.008	1.008	4.43688	0.6195
120	-40	119.757	123.964	116.279	0.086	1.345	-0.582	3.847	-177.184	179.55	176.602	356.602	356.602	-3.398	-3.923	181.031	361.031	1.031	1.031	4.45988	1.6325
120	-30	119.373	124.043	116.584	0.063	1.344	-0.145	3.101	-177.219	179.826	177.074	357.074	357.074	-2.926	-3.451	180.32	360.32	0.32	0.32	3.74888	1.478
120	-20	119	124.266	116.734	0.026	1.343	0.516	1.254	-177.601	179.371	178.117	358.117	358.117	-1.883	-2.408	178.855	358.855	358.855	-1.145	2.28388	0.885
120	-10	118.788	124.255	116.957	0	1.343	2.114	-2.174	-177.630	177.57	179.744	359.744	359.744	-0.256	-0.781	175.456	355.456	355.456	-4.544	-1.11512	-0.03
120	10	118.697	124.143	117.16	0.085	1.344	4.108	-9.217	-179.290	174.182	183.398	363.398	3.398	3.398	2.873	170.073	350.073	350.073	-9.927	-6.49812	-2.5545
120	20	118.834	123.957	117.209	0.186	1.345	4.557	-12.201	179.527	172.829	-174.97	5.03	5.03	5.03	4.505	-191.728	-11.728	348.272	-11.728	-8.29912	-3.822
120	30	119.05	123.709	117.241	0.232	1.346	5.015	-12.398	179.424	173.194	-174.409	5.591	5.591	5.591	5.066	-191.822	-11.822	348.178	-11.822	-8.39312	-3.6915
120	40	119.397	123.443	117.16	0.212	1.346	4.508	-10.534	179.173	174.801	-174.665	5.335	5.335	5.335	4.81	-189.707	-9.707	350.293	-9.707	-6.27812	-3.013
120	50	119.888	123.387	116.725	0.087	1.347	3.43	-4.252	-179.959	179.137	183.389	363.389	3.389	3.389	2.864	175.707	355.707	355.707	-4.293	-0.864122	-0.411
120	60	120.438	123.226	116.336	0.011	1.348	2.508	0.883	-178.696	177.913	181.204	361.204	1.204	1.204	0.679	179.579	359.579	359.579	-0.421	3.00788	1.6955
120	70	120.854	123.44	115.706	0.007	1.348	2.471	3.997	-176.593	176.939	179.064	359.064	359.064	-0.936	-1.461	180.59	360.59	0.59	0.59	4.01888	3.234
120	80	121.094	123.573	115.333	0.019	1.348	1.288	3.646	-177.134	177.933	178.422	358.422	358.422	-1.578	-2.103	180.78	360.78	0.78	0.78	4.20888	2.467
120	90	121.063	123.643	115.294	0.026	1.347	1.74	2.501	-176.410	179.349	178.15	358.15	358.15	-1.85	-2.375	178.911	358.911	358.911	-1.089	2.33988	2.1205
120	100	120.852	123.821	115.327	0.017	1.347	-0.236	1.289	-178.769	179.822	178.533	358.533	358.533	-1.467	-1.992	180.058	360.058	0.058	0.058	3.48688	0.5265
120	110	120.841	123.759	115.4	0.006	1.347	0.227	-0.456	-178.863	178.633	179.09	359.09	359.09	-0.91	-1.435	178.407	358.407	358.407	-1.593	1.83588	-0.1145
120	120	120.794	123.706	115.5	0.001	1.347	-0.011	-3.045	179.759	177.185	-179.77	0.23	0.23	0.23	-0.295	-182.804	-2.804	357.196	-2.804	0.624878	-1.528
120	130	121.011	123.768	115.221	0.008	1.346	-1.128	-4.11	177.857	176.905	-178.985	1.015	1.015	1.015	0.49	-181.967	-1.967	358.033	-1.967	1.46188	-2.619
120	140	121.313	123.858	114.829	0.021	1.347	-1.379	-5.056	176.954	176.611	-178.333	1.667	1.667	1.667	1.142	-182.01	-2.01	357.99	-2.01	1.41888	-3.2175
120	150	121.609	123.911	114.48	0.029	1.347	-1.434	-5.284	176.632	176.65	-178.066	1.934	1.934	1.934	1.409	-181.916	-1.916	358.084	-1.916	1.51288	-3.359
120	160	121.885	123.918	114.197	0.02	1.347	-0.857	-4.651	177.542	176.95	-178.399	1.601	1.601	1.601	1.076	-182.193	-2.193	357.807	-2.193	1.23588	-2.754
120	170	121.918	123.803	114.279	0.003	1.347	0.624	-3.772	179.904	176.948	-179.28	0.72	0.72	0.72	0.195	-183.676	-3.676	356.324	-3.676	-0.247122	-1.574
120	180	121.681	123.945	114.374	0.003	1.347	0.271	-1.081	-179.201	178.392	179.472	359.472	359.472	-0.528	-1.053	178.12	358.12	358.12	-1.88	1.54888	-0.405
150	-180	121.081	123.954	114.965	0.001	1.343	1.829	-2.158	-177.779	177.451	179.608	359.608	359.608	-0.392	-0.917	175.621	355.621	355.621	-4.379	-0.950122	-0.1645
150	-170	120.921	124.18	114.899	0.006	1.344	3.308	-0.222	-175.790	178.876	179.098	359.098	359.098	-0.902	-1.427	175.568	355.568	355.568	-4.432	-1.00312	1.543
150	-160	120.664	124.153	115.183	0.004	1.344	4.414	-0.146	-174.841	179.109	179.255	359.255	359.255	-0.745	-1.27	174.695	354.695	354.695	-5.305	-1.87612	2.134
150	-150	120.346	124.099	115.555	0.001	1.343	5.215	-0.41	-174.464	179.269	179.679	359.679	359.679	-0.321	-0.846	174.054	354.054	354.054	-5.946	-2.51712	2.4025
150	-140	120.057	124.079	115.864	0.002	1.344	5.343	-1.27	-175.093	179.167	180.436	360.436	0.436	0.436	-0.089	173.823	353.823	353.823	-6.177	-2.74812	2.0365
150	-130	119.785	124.09	116.125	0.012	1.344	4.963	-2.141	-176.335	179.158	181.298	361.298	1.298	1.298	0.773	174.194	354.194	354.194	-5.806	-2.37712	1.411
150	-120	119.745	124.008	116.247	0.037	1.344	3.895	-3.615	-178.348	178.628	182.243	362.243	2.243	2.243	1.718	174.733	354.733	354.733	-5.267	-1.83812	0.14
150	-110	119.863	124.023	116.114	0.054	1.345	3.003	-4.03	-179.678	178.651	182.681	362.681	2.681	2.681	2.156	175.648	355.648	355.648	-4.352	-0.923122	-0.5135
150	-100	120.183	123.941	115.876	0.063	1.345	1.366	-4.599	178.472	178.296	-177.106	2.894	2.894	2.894	2.369	-183.071	-3.071	356.929	-3.071	0.357878	-1.6165
150	-90	120.512	123.863	115.625	0.044	1.346	0.347	-4.254	177.958	178.135	-177.611	2.389	2.389	2.389	1.864	-182.212	-2.212	357.788	-2.212	1.21688	-1.9535
150	-80	120.75	123.834	115.416	0.013	1.346	-0.712	-2.993	177.993	178.302	-178.705	1.295	1.295	1.295	0.77	-180.986	-0.986	359.014	-0.986	2.44288	-1.8525
150	-70	120.886	123.741	115.373	0	1.346	-1.076	-1.317	178.975	178.632	-180.051	-0.051	359.949	-0.051	-0.576	-180.292	-0.292	359.708	-0.292	3.13688	-1.1965
150	-60	120.688	123.989	115.323	0.028	1.346	-1.643	1.866	-179.732	179.955	178.089	358.089	358.089	-1.911	-2.436	181.598	361.598	1.598	1.598	5.02688	0.1115
150	-50	120.417	123.968	115.615	0.051	1.346	-1.231	2.448	-178.629	179.847	177.398	357.398	357.398	-2.602	-3.127	181.077	361.077	1.077	1.077	4.50588	0.6085
150	-40	120.048	123.985	115.967	0.05	1.342	1.92	-2.077	-178.583	178.838	180.503	360.503	0.503	0.503	-0.022	176.506	356.506	356.506	-3.494	-0.0651216	-0.0785
150	-30	119.499	124.18	116.321	0.038	1.345	1.542	-0.103	-176.226	177.664	177.768	357.768	357.768	-2.232	-2.757	176.123	356.123	356.123	-3.877	-0.448122	0.7195
150	-20	119.111	124.083	116.806	0.004	1.345	2.928	-3.841	-176.289	175.377	179.217	359.217	359.217	-0.783	-1.308	172.448	352.448	352.448	-7.552	-4.12312	-0.4565
150	-7.5	118.709	124.032	117.259	0.014	1.345	3.967	-8.531	-177.448	172.883	181.415	361.415	1.415	1.415	0.89	168.917	348.917	348.917	-11.083	-7.65412	-2.282
150	-5	118.649	123.998	117.353	0.027	1.345	4.132	-9.536	-177.786	172.381	181.918	361.918	1.918	1.918	1.393	168.25	348.25	348.25	-11.75	-8.32112	-2.702
150	-2.5	118.595	123.96	117.445	0.042	1.345	4.256	-10.514	-178.172	171.913	182.428	362.428	2.428	2.428	1.903	167.658	347.658	347.658	-12.342	-8.91312	-3.129
150	0	118.547	123.913	117.54	0.063	1.345	4.325	-11.428	-178.611	171.508	182.936	362.936	2.936	2.936	2.411	167.183	347.183	347.183	-12.817	-9.38812	-3.5515
150	5	118.471	123.82	117.709	0.113	1.346	4.214	-13.125	-179.721	170.809	183.935	363.935	3.935	3.935	3.41	166.596	346.596	346.596	-13.404	-9.97512	-4.4555
150	10	118.428	123.731	117.841	0.165	1.346	4.316	-14.309	179.563	170.444	-175.247	4.753	4.753	4.753	4.228	-193.872	-13.872	346.128	-13.872	-10.4431	-4.9965
150	20	118.357	123.426	118.217	0.249	1.347	4.601	-14.906	178.765	170.93	-174.164	5.836	5.836	5.836	5.311	-193.671	-13.671	346.329	-13.671	-10.2421	-5.1525
150	30	118.348	123.137	118.515	0.22	1.346	4.108	-10.917	178.622	174.568	-174.514	5.486	5.486	5.486	4.961	-189.539	-9.539	350.461	-9.539	-6.11012	-3.4045
150	40	118.993	123.099	117.908	0.073	1.347	2.258	-0.455	179.116	177.313	-176.858	3.142	3.142	3.142	2.617	-179.571	0.429	0.429	0.429	3.85788	0.9015
150	50	120.25	123.474	116.276	0.002	1.35	0.413	7.856	-179.986	171.745	180.399	360.399	0.399	0.399	-0.126	187.842	367.842	7.842	7.842	11.2709	4.1345
150	60	120.824	123.428	115.748	0	1.349	1.169	6.889	-178.5	173.442	179.669	359.669	359.669	-0.331	-0.856	185.389	365.389	5.389	5.389	8.81788	4.029
150	70	121.123	123.591	115.286	0.008	1.349	0.603	6.064	-178.364	174.969	178.967	358.967	358.967	-1.033	-1.558	184.428	364.428	4.428	4.428	7.85688	3.3335
150	80	121.245	123.74	115.015	0.024	1.348	1.845	4.566	-176.414	177.175	178.259	358.259	358.259	-1.741	-2.266	180.98	360.98	0.98	0.98	4.40888	3.2055
150	90	121.095	123.735	115.17	0.022	1.347	0.972	2.801	-177.353	178.874	178.325	358.325	358.325	-1.675	-2.2	180.154	360.154	0.154	0.154	3.58288	1.8865
150	100	120.923	123.772	115.305	0.011	1.347	0.389	0.516	-178.452	179.357	178.841	358.841	358.841	-1.159	-1.684	178.968	358.968	358.968	-1.032	2.39688	0.4525
150	110	120.939	123.791	115.27	0.002	1.346	-0.165	-1.147	-179.638	178.324	179.473	359.473	359.473	-0.527	-1.052	178.491	358.491	358.491	-1.509	1.91988	-0.656
150	120	120.977	123.766	115.257	0	1.346	-0.487	-2.753	179.358	177.402	-179.845	0.155	0.155	0.155	-0.37	-182.111	-2.111	357.889	-2.111	1.31788	-1.62
150	130	120.964	123.828	115.208	0.002	1.346	-2.246	-3.211	177.196	177.347	-179.442	0.558	0.558	0.558	0.033	-180.407	-0.407	359.593	-0.407	3.02188	-2.7285
150	140	121.11	123.814	115.076	0.004	1.345	-2.18	-4.655	177.035	176.13	-179.215	0.785	0.785	0.785	0.26	-181.69	-1.69	358.31	-1.69	1.73888	-3.4175
150	150	120.999	123.991	115.01	0	1.344	-2.812	-3.535	177	176.653	-179.812	0.188	0.188	0.188	-0.337	-180.535	-0.535	359.465	-0.535	2.89388	-3.1735
150	160	121.045	124.109	114.846	0	1.344	-2.51	-2.712	177.521	177.257	-180.031	-0.031	359.969	-0.031	-0.556	-180.233	-0.233	359.767	-0.233	3.19588	-2.611
150	170	121.1	124.023	114.877	0.001	1.344	-0.288	-2.226	179.999	177.487	-180.287	-0.287	359.713	-0.287	-0.812	-182.225	-2.225	357.775	-2.225	1.20388	-1.257
150	180	121.081	123.954	114.965	0.001	1.343	1.829	-2.158	-177.779	177.451	179.608	359.608	359.608	-0.392	-0.917	175.621	355.621	355.621	-4.379	-0.950122	-0.1645
180	-180	121.005	124.026	114.969	0.003	1.343	1.388	-2.403	-179.151	178.137	180.539	360.539	0.539	0.539	0.014	176.748	356.748	356.748	-3.252	0.176878	-0.5075
180	-170	120.885	124.025	115.09	0	1.343	3.537	-1.682	-176.659	178.514	180.196	360.196	0.196	0.196	-0.329	174.977	354.977	354.977	-5.023	-1.59412	0.9275
180	-160	120.71	124.025	115.265	0	1.343	5.375	-1.404	-174.837	178.809	180.212	360.212	0.212	0.212	-0.313	173.433	353.433	353.433	-6.567	-3.13812	1.9855
180	-150	120.473	124.212	115.315	0.002	1.343	5.347	-0.741	-175.158	179.764	180.505	360.505	0.505	0.505	-0.02	174.417	354.417	354.417	-5.583	-2.15412	2.303
180	-140	120.227	124.117	115.656	0.01	1.343	5.914	-1.59	-175.244	179.568	181.158	361.158	1.158	1.158	0.633	173.654	353.654	353.654	-6.346	-2.91712	2.162
180	-130	120.013	124.062	115.925	0.027	1.344	5.757	-2.674	-176.130	179.212	181.887	361.887	1.887	1.887	1.362	173.456	353.456	353.456	-6.544	-3.11512	1.5415
180	-120	119.954	123.928	116.118	0.054	1.344	5.106	-4.05	-177.570	178.626	182.676	362.676	2.676	2.676	2.151	173.52	353.52	353.52	-6.48	-3.05112	0.528
180	-110	120.116	123.934	115.95	0.063	1.345	3.35	-4.333	-179.528	178.545	182.878	362.878	2.878	2.878	2.353	175.195	355.195	355.195	-4.805	-1.37612	-0.4915
180	-100	120.424	123.879	115.697	0.059	1.346	2.47	-4.715	179.665	178.09	-177.195	2.805	2.805	2.805	2.28	-184.38	-4.38	355.62	-4.38	-0.951122	-1.1225
180	-90	120.767	123.873	115.36	0.039	1.346	0.976	-4.703	178.713	177.56	-177.737	2.263	2.263	2.263	1.738	-183.416	-3.416	356.584	-3.416	0.0128784	-1.8635
180	-80	120.97	123.849	115.181	0.014	1.347	0.402	-4.254	179.022	177.125	-178.62	1.38	1.38	1.38	0.855	-183.276	-3.276	356.724	-3.276	0.152878	-1.926
180	-70	121.053	123.847	115.1	0.002	1.347	-0.38	-3.967	179.151	176.502	-179.531	0.469	0.469	0.469	-0.056	-183.118	-3.118	356.882	-3.118	0.310878	-2.1735
180	-60	120.928	123.795	115.277	0.003	1.348	0.079	-3.475	-179.368	175.972	179.447	359.447	359.447	-0.553	-1.078	175.893	355.893	355.893	-4.107	-0.678122	-1.698
180	-50	120.575	123.764	115.661	0.011	1.348	0.648	-3.57	-178.123	175.201	178.771	358.771	358.771	-1.229	-1.754	174.553	354.553	354.553	-5.447	-2.01812	-1.461
180	-40	120.07	123.815	116.115	0.013	1.348	1.522	-4.862	-177.151	173.812	178.673	358.673	358.673	-1.327	-1.852	172.289	352.289	352.289	-7.711	-4.28212	-1.67
180	-30	119.462	123.841	116.697	0.005	1.348	3.029	-7.324	-176.161	171.866	179.19	359.19	359.19	-0.81	-1.335	168.837	348.837	348.837	-11.163	-7.73412	-2.1475
180	-20	118.864	123.759	117.377	0.001	1.348	3.985	-10.684	-176.503	169.804	180.488	360.488	0.488	0.488	-0.037	165.819	345.819	345.819	-14.181	-10.7521	-3.3495
180	-10	118.352	123.579	118.069	0.033	1.349	4.835	-14.333	-177.297	167.799	182.132	362.132	2.132	2.132	1.607	162.964	342.964	342.964	-17.036	-13.6071	-4.749
180	0	117.783	123.364	118.853	0.058	1.347	-1.653	12.082	-178.796	170.775	177.143	357.143	357.143	-2.857	-3.382	190.878	370.878	10.878	10.878	14.3069	5.2145
180	10	118.239	123.558	118.203	0.014	1.347	-1.924	10.309	179.422	171.037	-181.346	-1.346	358.654	-1.346	-1.871	-169.113	10.887	10.887	10.887	14.3159	4.1925
180	20	118.81	123.658	117.532	0.001	1.347	-1.603	7.078	178.079	172.604	-179.682	0.318	0.318	0.318	-0.207	-171.001	8.999	8.999	8.999	12.4279	2.7375
180	30	119.391	123.79	116.819	0.019	1.347	-0.232	3.3	178.175	175.107	-178.407	1.593	1.593	1.593	1.068	-174.875	5.125	5.125	5.125	8.55388	1.534
180	40	119.992	123.898	116.11	0.036	1.347	1.929	0.31	179.759	177.52	-177.83	2.17	2.17	2.17	1.645	-179.449	0.551	0.551	0.551	3.97988	1.1195
180	50	120.51	123.9	115.59	0.036	1.348	2.711	-1.092	-179.467	178.914	182.178	362.178	2.178	2.178	1.653	178.375	358.375	358.375	-1.625	1.80388	0.8095
180	60	120.776	123.922	115.302	0.017	1.348	3.374	-1.195	-178.123	179.698	181.497	361.497	1.497	1.497	0.972	176.928	356.928	356.928	-3.072	0.356878	1.0895
180	70	120.982	123.834	115.184	0.002	1.348	3.191	-0.978	-177.409	179.622	180.6	360.6	0.6	0.6	0.075	176.431	356.431	356.431	-3.569	-0.140122	1.1065
180	80	121.008	123.845	115.147	0.001	1.347	2.743	-0.257	-176.770	179.255	179.513	359.513	359.513	-0.487	-1.012	176.513	356.513	356.513	-3.487	-0.0581216	1.243
180	90	120.8	123.846	115.354	0.013	1.346	1.633	0.276	-177.064	178.973	178.697	358.697	358.697	-1.303	-1.828	177.34	357.34	357.34	-2.66	0.768878	0.9545
180	100	120.39	123.933	115.677	0.03	1.345	0.908	0.568	-177.097	178.573	178.005	358.005	358.005	-1.995	-2.52	177.665	357.665	357.665	-2.335	1.09388	0.738
180	110	120.116	123.965	115.919	0.032	1.344	-0.498	-0.025	-178.452	177.929	177.954	357.954	357.954	-2.046	-2.571	178.427	358.427	358.427	-1.573	1.85588	-0.2615
180	120	120.099	123.952	115.949	0.015	1.343	-1.892	-1.238	179.51	177.36	-181.402	-1.402	358.598	-1.402	-1.927	-180.748	-0.748	359.252	-0.748	2.68088	-1.565
180	130	119.951	124.056	115.993	0.009	1.343	1.795	-1.627	-178.577	177.3	180.372	360.372	0.372	0.372	-0.153	176.95	356.95	356.95	-3.05	0.378878	0.084
180	140	120.157	124.026	115.817	0	1.343	-2.786	-3.142	177.384	176.688	-180.17	-0.17	359.83	-0.17	-0.695	-180.526	-0.526	359.474	-0.526	2.90288	-2.964
180	150	120.425	124.034	115.541	0.002	1.343	-1.914	-3.905	177.631	176.551	-179.545	0.455	0.455	0.455	-0.07	-181.536	-1.536	358.464	-1.536	1.89288	-2.9095
180	160	120.71	124.026	115.264	0.006	1.343	-1.416	-3.951	177.736	176.897	-179.152	0.848	0.848	0.848	0.323	-181.687	-1.687	358.313	-1.687	1.74188	-2.6835
180	170	120.92	124.054	115.026	0.007	1.343	-0.785	-3.478	178.269	177.468	-179.054	0.946	0.946	0.946	0.421	-181.747	-1.747	358.253	-1.747	1.68188	-2.1315
180	180	121.005	124.026	114.969	0.003	1.343	1.388	-2.403	-179.151	178.137	180.539	360.539	0.539	0.539	0.014	176.748	356.748	356.748	-3.252	0.176878	-0.5075
				Mean	0.0368581	1.34577							Mean χC	0.525				Mean χN	-3.42888		-0.418919
				Std Dev.	0.0484891	0.0023877
